# Supplementary material for: WNT-modulating gene silencers as a gene therapy for osteoporosis, bone fracture, and critical-sized bone defects
Source: PubMed Central journal article supplement — Mol Ther. 2022 Oct 3;31(2):435–53. doi: 10.1016/j.ymthe.2022.09.018 (PMC9931550; doi:10.1016/j.ymthe.2022.09.018), 2022-10-03
Supplement: mmc1.pdf [file mmc1.pdf]

**Supplemental Information**

**WNT-modulating gene silencers as a gene  
therapy for osteoporosis, bone  
fracture, and critical-sized bone defects**

**Won-Taek Oh, Yeon-Suk Yang, Jun Xie, Hong Ma, Jung-Min Kim, Kwang-Hwan Park, Daniel S. Oh, Kyung-Hyun Park-Min, Matthew B. Greenblatt, Guangping Gao, and Jae-Hyuck Shim**

**Supplementary Materials for:**

**WNT-modulating gene silencers as a gene therapy for osteoporosis, bone fracture, and critical-sized bone defects**

Won-Taek Oh<sup>1,2,†</sup>, Yeon-Suk Yang<sup>1,†</sup>, Jun Xie<sup>3,4,5</sup>, Hong Ma<sup>3,4,5</sup>, Jung-Min Kim<sup>1</sup>, Kwang-Hwan Park<sup>2</sup>, Daniel S. Oh<sup>6</sup>, Kyung-Hyun Park-Min<sup>7,8</sup>, Matthew B. Greenblatt<sup>8,9</sup>, Guangping Gao<sup>3,4,5,10\*</sup>, and Jae-Hyuck Shim<sup>1,3,10\*</sup>

†These authors contributed equally to this work.

\*Corresponding authors: Jae-Hyuck Shim. Email: [jaehyuck.shim@umassmed.edu](mailto:jaehyuck.shim@umassmed.edu) and Guangping Gao. Email: [guangping.gao@umassmed.edu](mailto:guangping.gao@umassmed.edu)

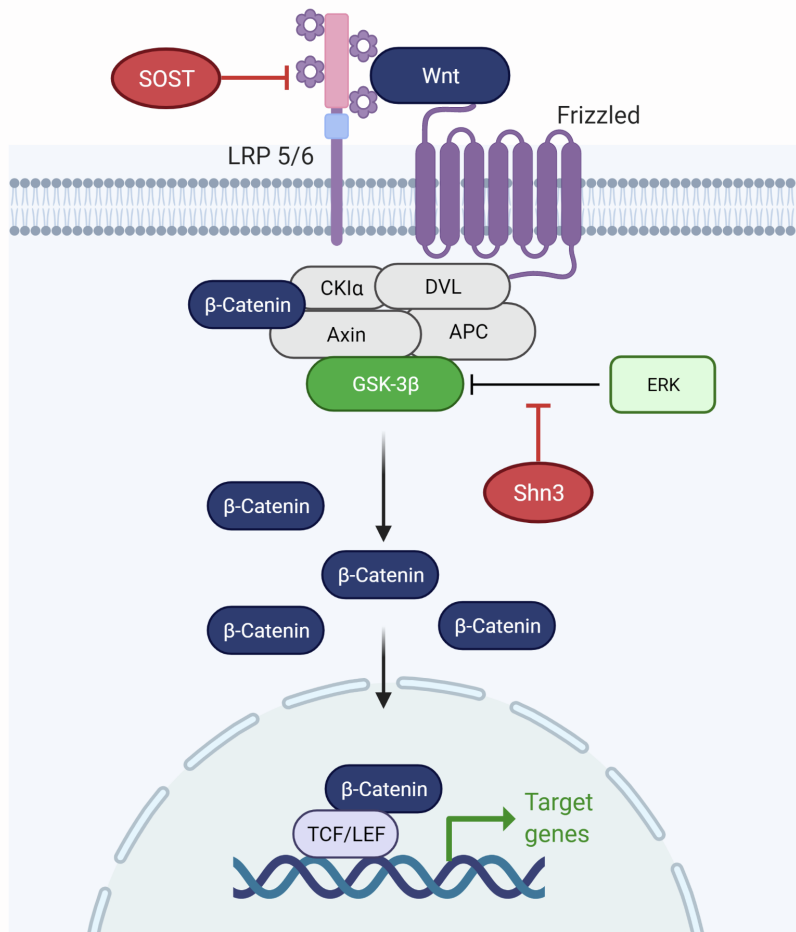

**Fig. S1. Schematic diagram showing the molecular mechanism of SHN3 and SOST in the WNT/β-catenin pathway** (created with biorender.com). Abbreviations: CK1α, casein kinase 1α; LRP 5/6, low-density lipoprotein receptor-related proteins 5 and 6; DVL, dishevelled; APC, adenomatous polyposis coli; GSK-3β, glycogen synthase kinase 3 beta; ERK, extracellular signal-regulated kinase; TCF/LEF, T-cell factor/lymphoid enhancer factor.

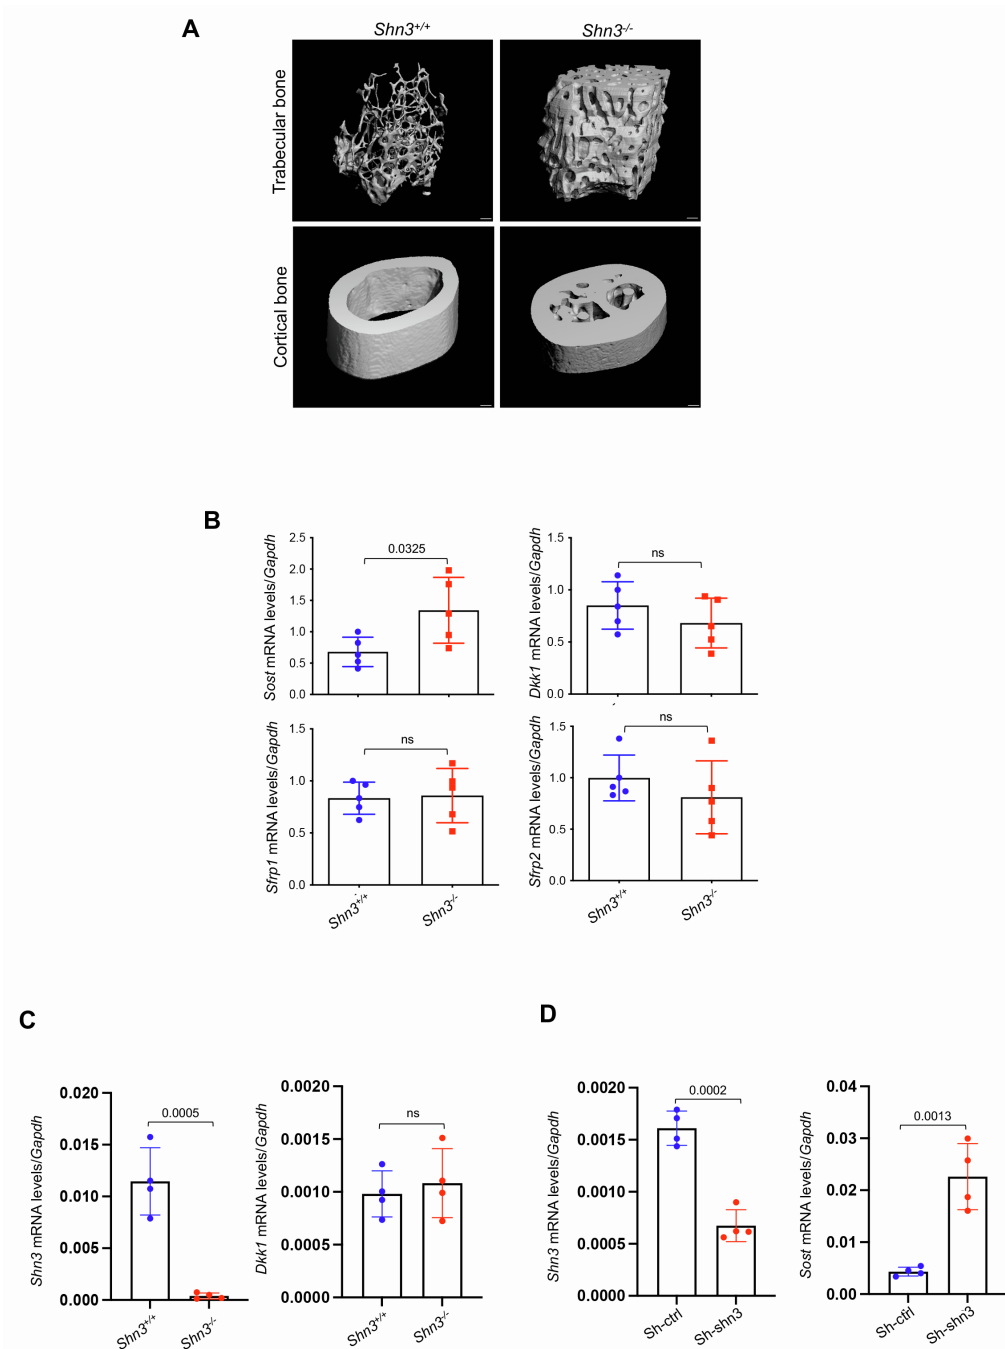

**Fig. S2. Expression of secreted WNT antagonists in *Shn3*<sup>-/-</sup> mice.**

**A.** MicroCT analysis showing trabecular bone mass and midshaft cortical bone thickness in femurs obtained from 2-month-old *shn3*<sup>+/+</sup> and *shn3*<sup>-/-</sup> mice. Scale bar: 200  $\mu$ m. **B.** mRNA levels of secreted WNT antagonists in the tibia, *Sost*, *Dkk1*, *Sfrp1*, or *Sfrp2*, were measured by RT-PCR. **C.** Calvarial osteoblasts were isolated from *shn3*<sup>+/+</sup> and *shn3*<sup>-/-</sup> pups at postnatal day 4 and mRNA levels of *Dkk1* were measured by RT-PCR. **D.** The osteocyte line OCY454 was transduced with lentiviruses expressing control-shRNA (Sh-ctrl)- or *Shn3*-shRNA (Sh-shn3) and mRNA levels of *Sost* were measured by RT-PCR. Values represent mean  $\pm$  SD by an unpaired two-tailed Student's t-test. ns, not significant.

**A**

Mature miR-33

mmu-miR-33 CUGUGGUGCAUUGUAGUUGCAUUGCAUGUUCUGGCAAUACCUGUGCAAUGUUUCCACAGUGCAUCACGG  
 hs- miR-33 CUGUGGUGCAUUGUAGUUGCAUUGCAUGUUCUGGGUACCCAUGCAAUGUUUCCACAGUGCAUCACAG

Seed sequence

**B**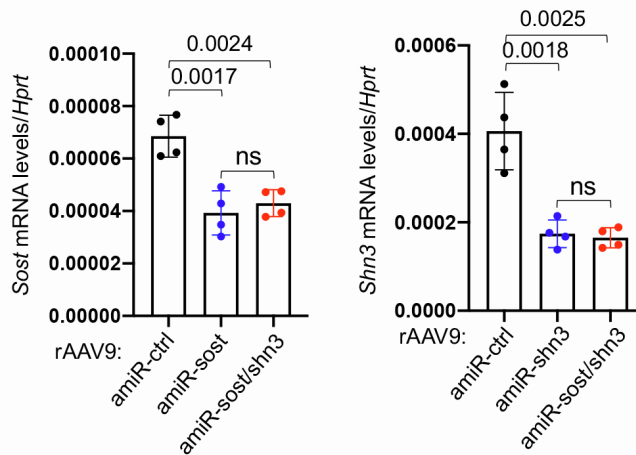

**Fig. S3. Characterization of human amiR targeting mouse *Shn3*.**

**A.** Nucleotide sequences of mouse (mmu-miR-33) and human (hs-miR-33) miR-33 that include mature and seed sequences (in blue) of miR-33. **B.** The Ocy454 osteocytic cell line was incubated with rAAV9.DSS carrying *amiR-ctrl*, *amiR-shn3*, *amiR-sost*, or *amiR-shn3/sost*, cultured under differentiation conditions for six days, and *Shn3* and *Sost* mRNA levels were measured by RT-PCR. Values represent mean ± SD by a one-way ANOVA test. ns, not significant.

**A**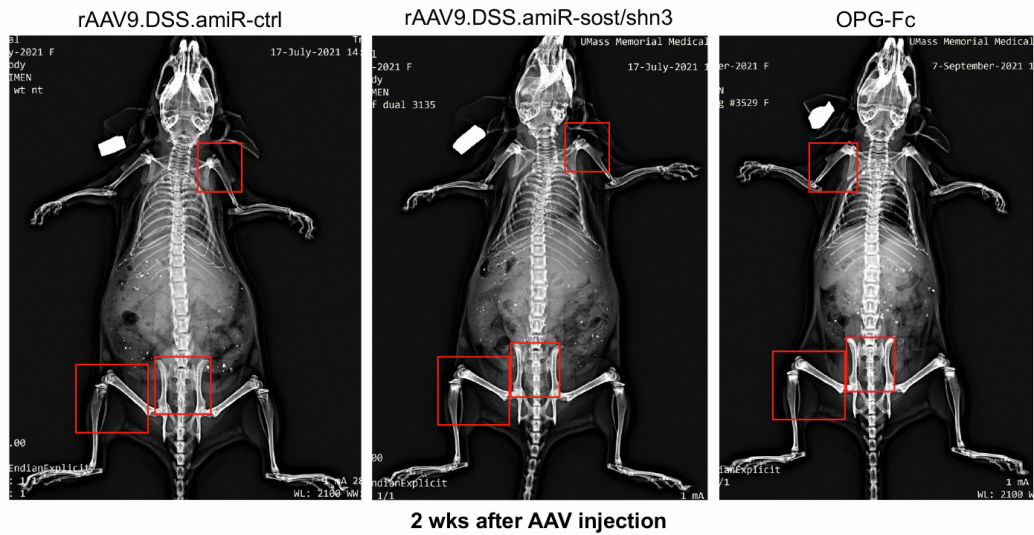**B**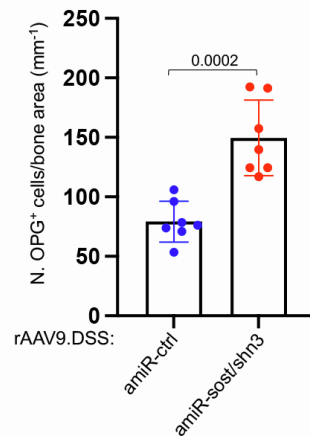**Fig. S4. Systemic delivery of WNT-modulating gene silencers increases bone accrual.**

**A.** One-month-old mice were treated with a single dose of rAAV9.DSS vectors carrying *amiR-ctrl* or *amiR-shn3/sost* ( $5 \times 10^{13}$  vg/kg) via intravenous (i.v.) injection or with OPG-Fc (1 mg/kg) via intraperitoneal (i.p.) injection and two weeks later, bone accrual was assessed by radiography. Red boxes indicate the areas of increased bone accretion. The same experiment was performed in **Fig. 2B**. **B.** Two-month-old mice were injected i.v. with rAAV9.DSS ( $5 \times 10^{13}$  vg/kg) carrying *amiR-ctrl* or *amiR-sost/shn3*, and four weeks later, immunohistochemistry for OPG was performed in AAV-treated femurs and OPG-expressing cells were quantitated ( $n = 7$ ). The same experiment was performed in **Fig. 2I**. Values represent mean  $\pm$  SD by a one-way ANOVA test.

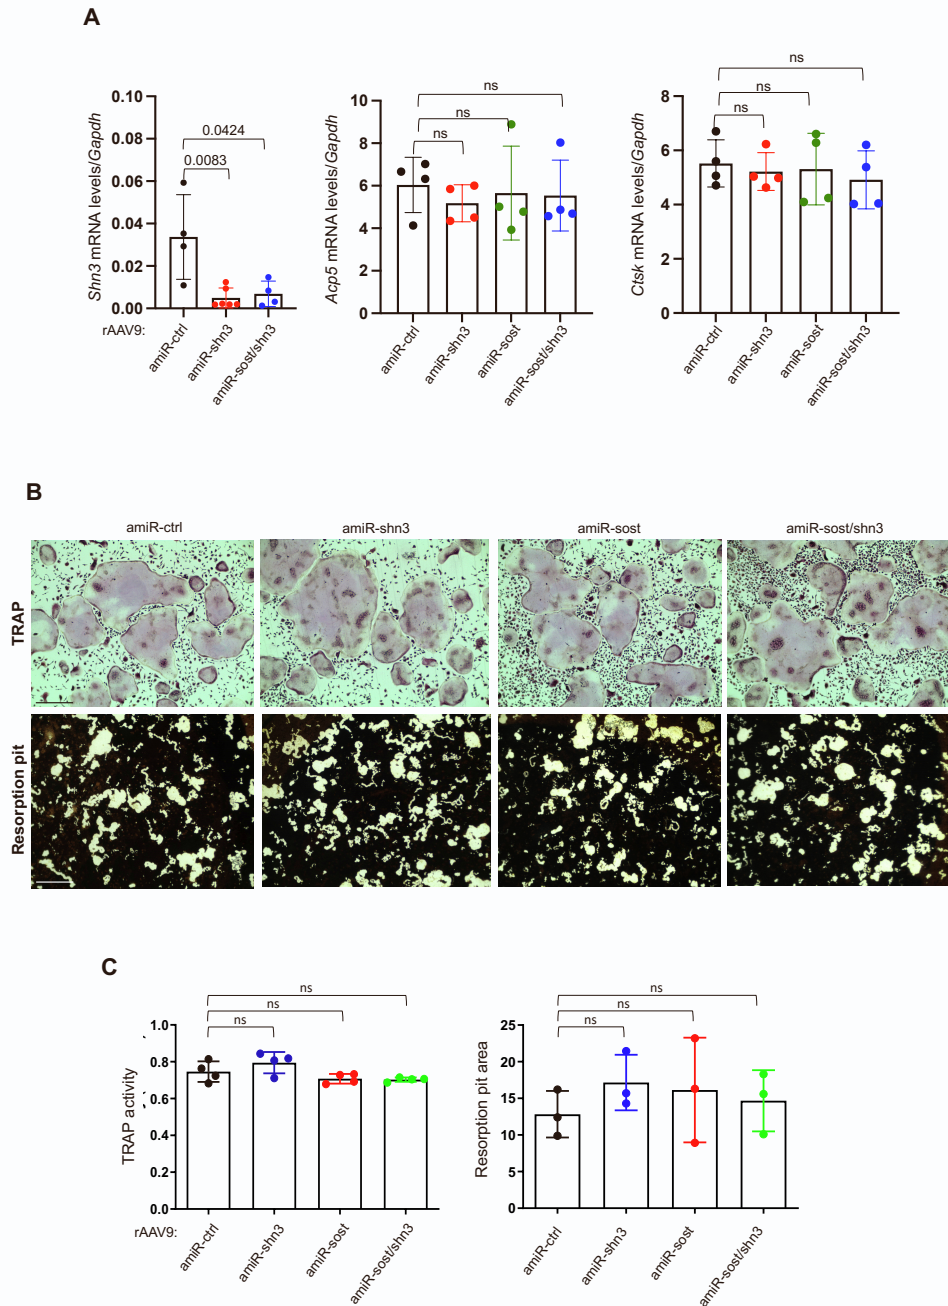

**Fig. S5. Effects of WNT-modulating gene silencers on osteoclast differentiation *in vitro*.**

Bone marrow-derived monocytes (BMMs) harvested from 2-month-old mice were treated with M-CSF (20 ng/ml) and RANKL (10 ng/ml) for one day and then transduced with rAAV9.DSS carrying *amiR-ctrl*, *amiR-shn3*, *amiR-sost*, or *amiR-shn3/sost* ( $5 \times 10^6$  MOI). AAV-transduced BMMs were cultured with M-CSF and RANKL for six days to differentiate them into mature osteoclasts. **A.** Expression of *Shn3* and osteoclastogenic genes, *Acp5* and *Ctsk*, was assessed by RT-PCR and normalized to *Gapdh* ( $n = 4$ ). *Sost* mRNAs were not detected by RT-PCR. **B, C.** Osteoclast differentiation and resorption activity were assessed by TRAP staining and resorption pit assay, respectively ( $n = 4$ ). Scale bars: 1 mm. Values represent mean  $\pm$  SD by a one-way ANOVA test. ns, not significant.

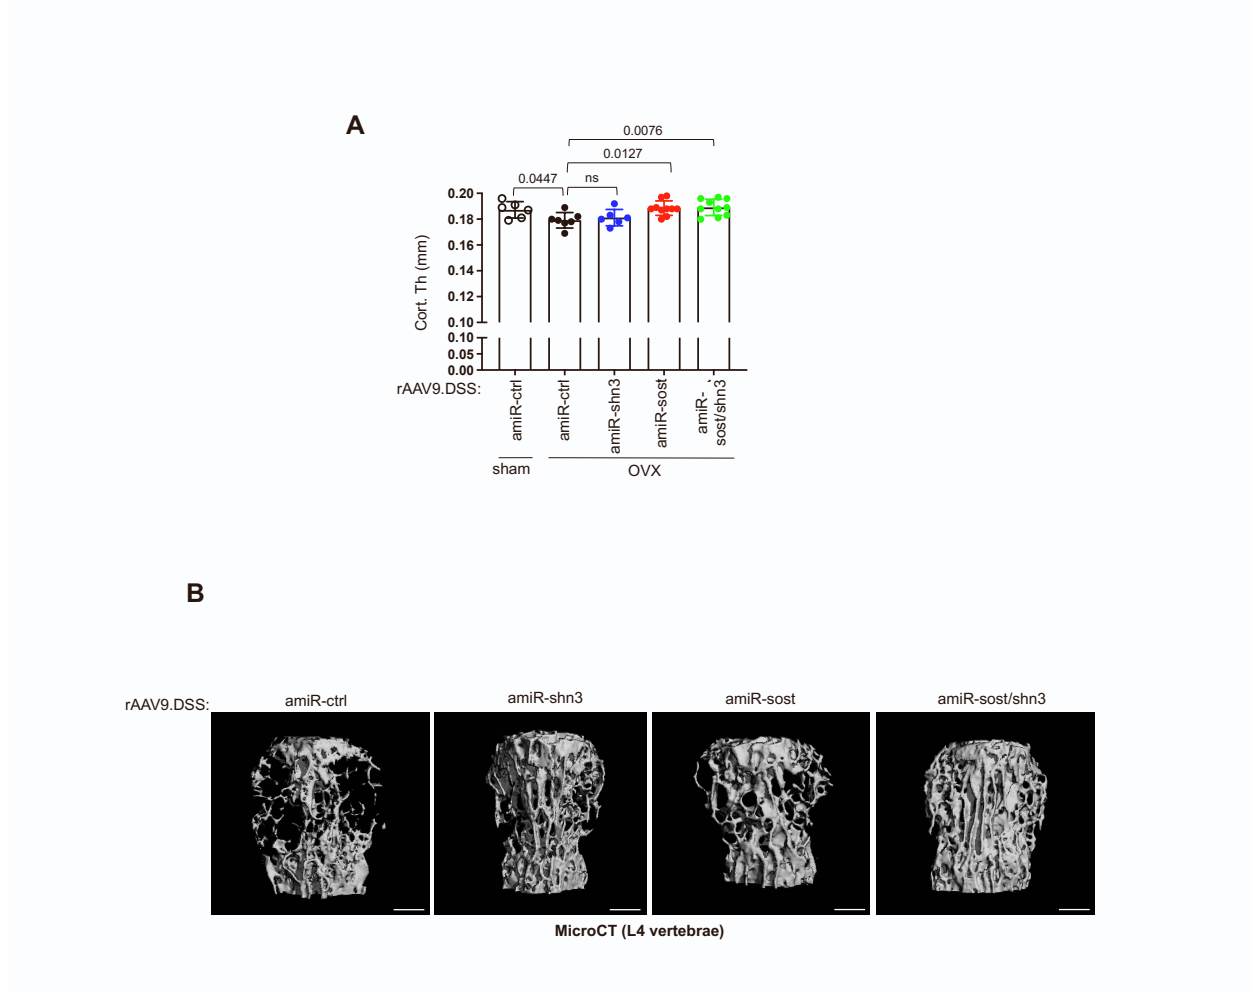

**Fig. S6. Bone-targeted AAV gene silencers reverse bone loss in mouse models of osteoporosis.**

**A.** Sham or OVX surgery was performed on three-month-old female mice, and six weeks later, mice were injected i.v. with rAAV9.DSS ( $5 \times 10^{13}$  vg/kg) carrying *amiR-ctrl*, *amiR-shn3*, *amiR-sost*, or *amiR-sost/shn3*. Eight weeks later, cortical thickness of AAV-treated femurs was assessed by microCT ( $n = 5-10$ ). The same experiment was performed in **Fig. 3E**. **B.** 20-month-old male mice were injected i.v. with rAAV9.DSS ( $5 \times 10^{13}$  vg/kg) carrying *amiR-ctrl*, *amiR-shn3*, *amiR-sost*, or *amiR-sost/shn3*, and two months later, trabecular bone mass in lumbar vertebrae (L4) was assessed by microCT. Representative 3D-reconstruction is displayed ( $n = 8-10$ ). Scale bars: 500  $\mu$ m. The same experiment was performed in **Fig. 3I**. Scale bars: 1 mm. Values represent mean  $\pm$  SD by a one-way ANOVA test. ns, not significant.



**A**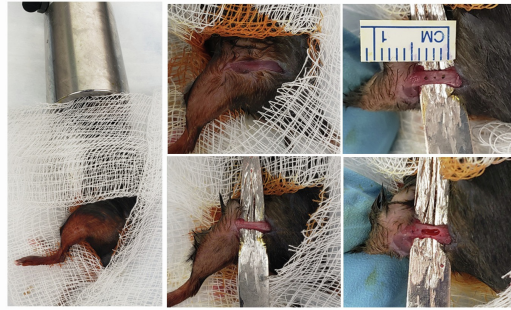**B**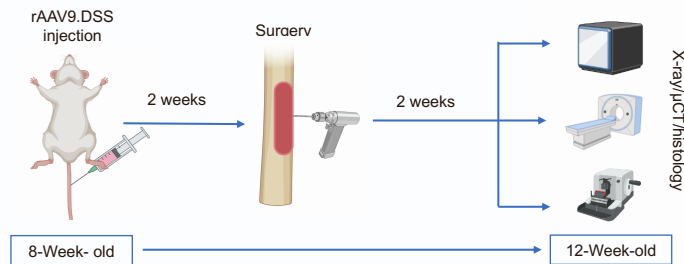**C**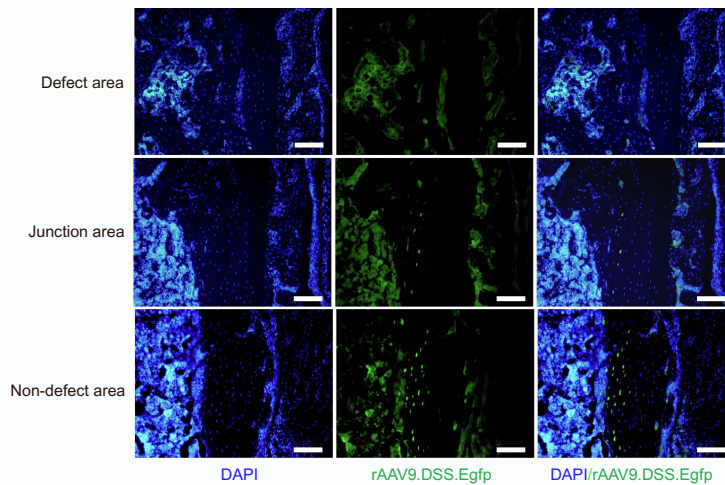

**Fig. S7. Effects of WNT-modulating gene silencers on the healing of cortical bone defects.**

**A.** Images showing the surgical procedure of cortical bone defect in the femur. **B.** Diagram of the study and treatment methods (created with biorender.com). **C.** 8-week-old mice were i.v. injected with rAAV9.DSS.egfp ( $5 \times 10^{13}$  vg/kg), and two weeks later, a 3 mm-length of cortical bone defect was generated on the lateral aspect of the left femurs. GFP expression in the cryo-sectioned femurs was visualized by fluorescence microscopy two weeks post-surgery (n=3). Scale bars: 500  $\mu$ m. The same experiment was performed in **Fig. 4A**.

**A**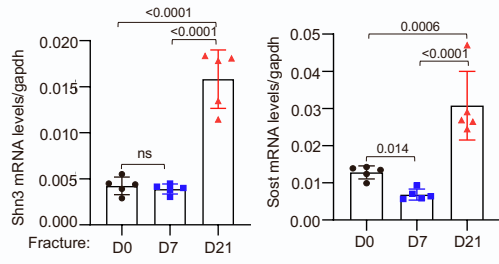**B**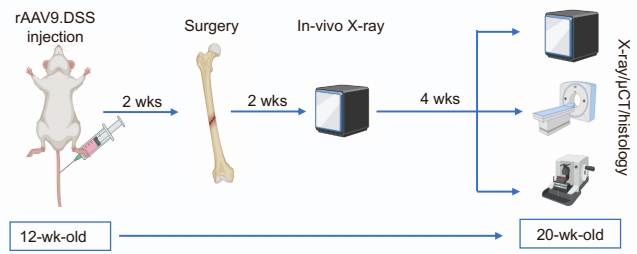**C**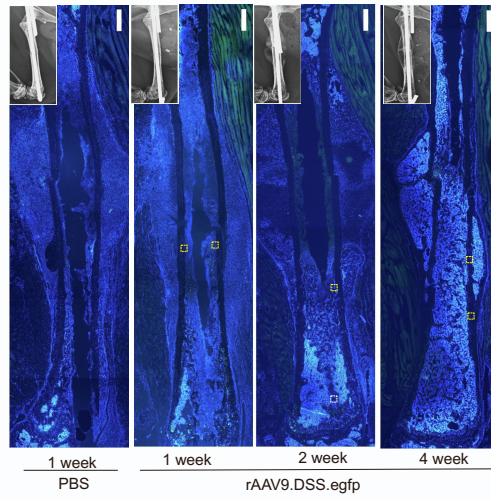**D**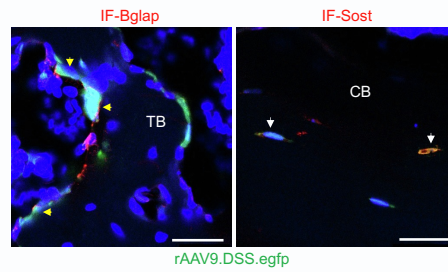

**Fig. S8. Systemic delivery of a bone-targeted AAV can transduce osteoblast-lineage cells at fracture sites.**

**A.** Tissue RNA was harvested from the tibial fracture sites, and mRNA levels of *Shn3* and *Sost* were measured by RT-PCR (n=5/group). **B.** Diagram of the study and treatment methods (created with biorender.com). **C-D.** Three-month-old mice were i.v. injected with rAAV9.DSS.egfp, and two weeks later, femoral osteotomy and intramedullary fixation were performed on the left femurs. To visualize AAV-transduced cells in the fracture areas, EGFP expression in the cryo-sectioned femurs was assessed by fluorescence microscopy 1, 2, and 4 weeks postoperatively (n = 3, **C**). Alternatively, cryo-sectioned femurs were immunostained with Bglap (osteoblasts, yellow arrows) or *Sost* (Osteocytes, white arrows, **D**). The same experiment was performed in **Fig. 4E**. Scale bars: C, 600  $\mu$ m; D, 25  $\mu$ m. Values represent mean  $\pm$  SD. Significance was tested with a one-way ANOVA test. ns, not significant.

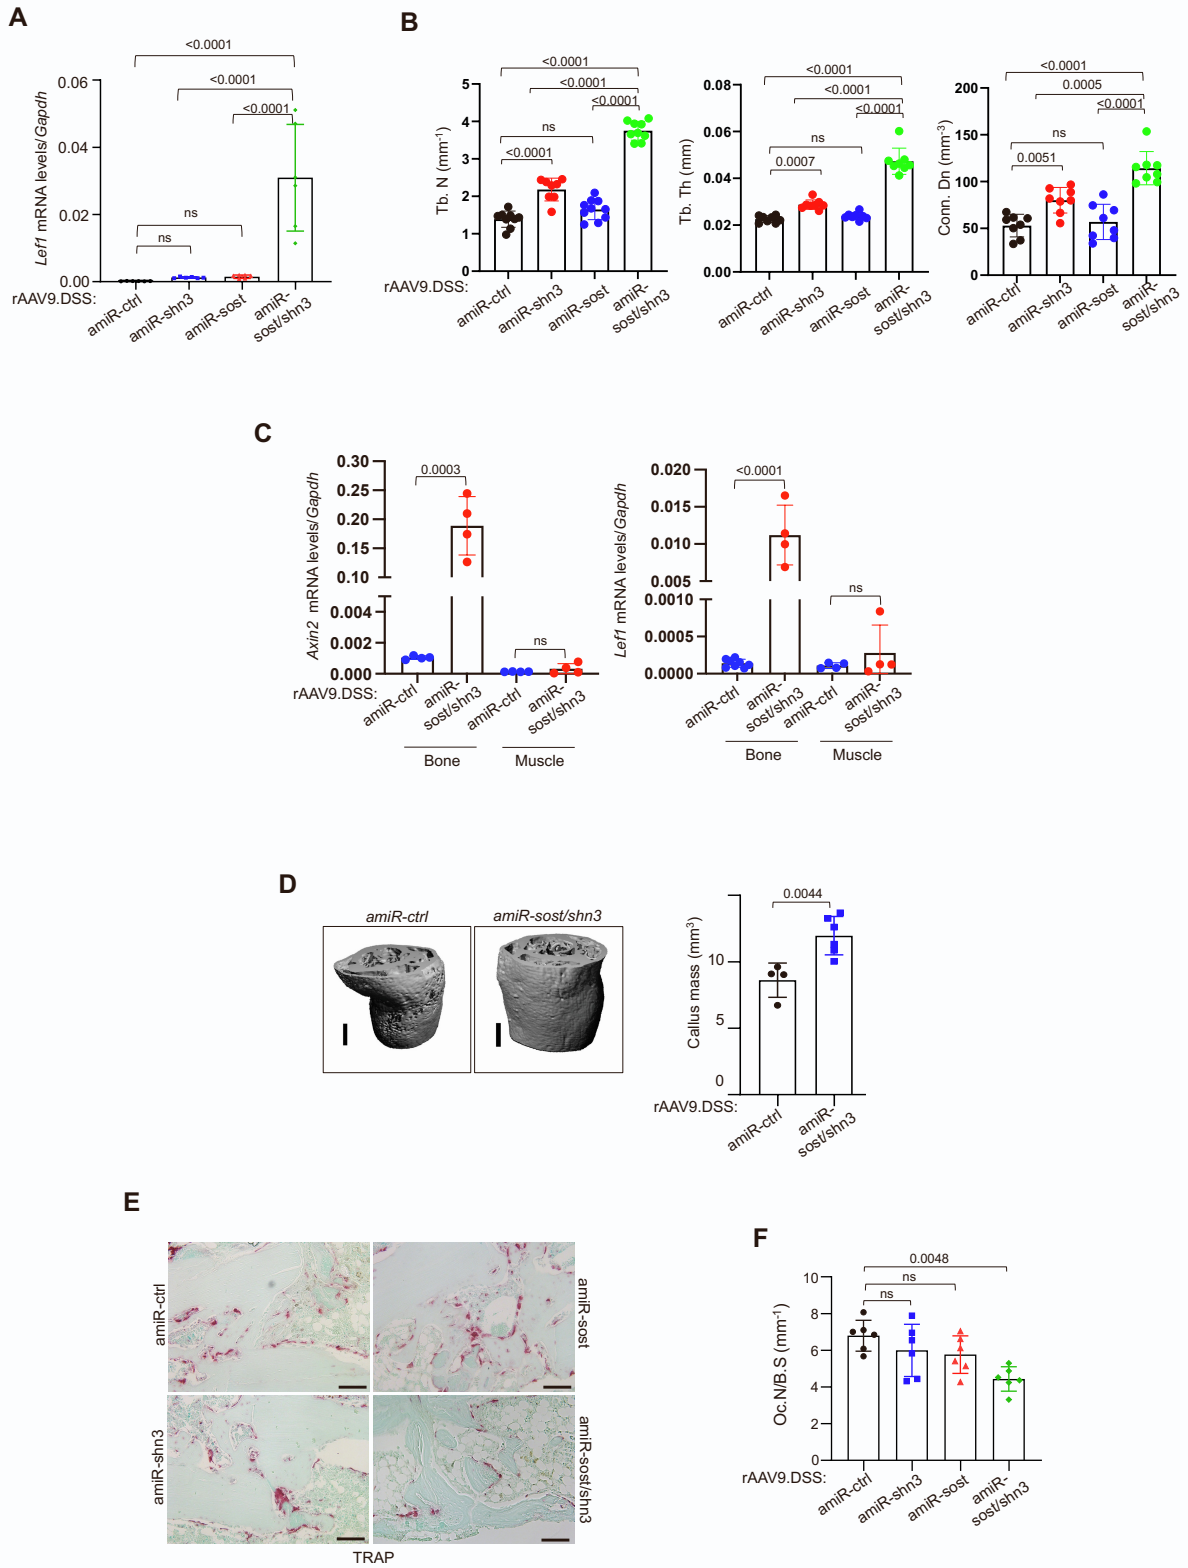

**Fig. S9. Effects of WNT-modulating gene silencers on bone fracture healing.**

Three-month-old mice were i.v. injected with rAAV9.DSS carrying *amiR-ctrl*, *amiR-shn3*, *amiR-sost*, or *amiR-sost/shn3*, and two weeks later, femoral osteotomy and intramedullary fixation were performed on the left femurs. mRNA levels of the  $\beta$ -catenin target gene *Lef1* in RNA from the contralateral tibia (**A**) or the skeletal muscle of the fractured femurs (**C**) were measured six weeks post-fracture (n = 8). The same experiment was performed in **Fig. 4G**, but for *Axin2* mRNA. Trabecular bone mass of contralateral femurs without the surgery (**B**) and callus bone mass in the fractured sites (**D**) were assessed by microCT (n = 8). Fractured sites of AAV-treated femurs were stained for TRAP and TRAP-stained osteoclasts were quantitated (n = 6, **E**, **F**). Tb.N: trabecular bone number, Tb.Th: trabecular bone thickness, Conn.D: connective density. Oc.N/B.S: osteoclast number/bone surface. Scale bar: D, 1 mm; E, 100  $\mu$ m. Values represent mean  $\pm$  SD by a one-way ANOVA test. ns, not significant.

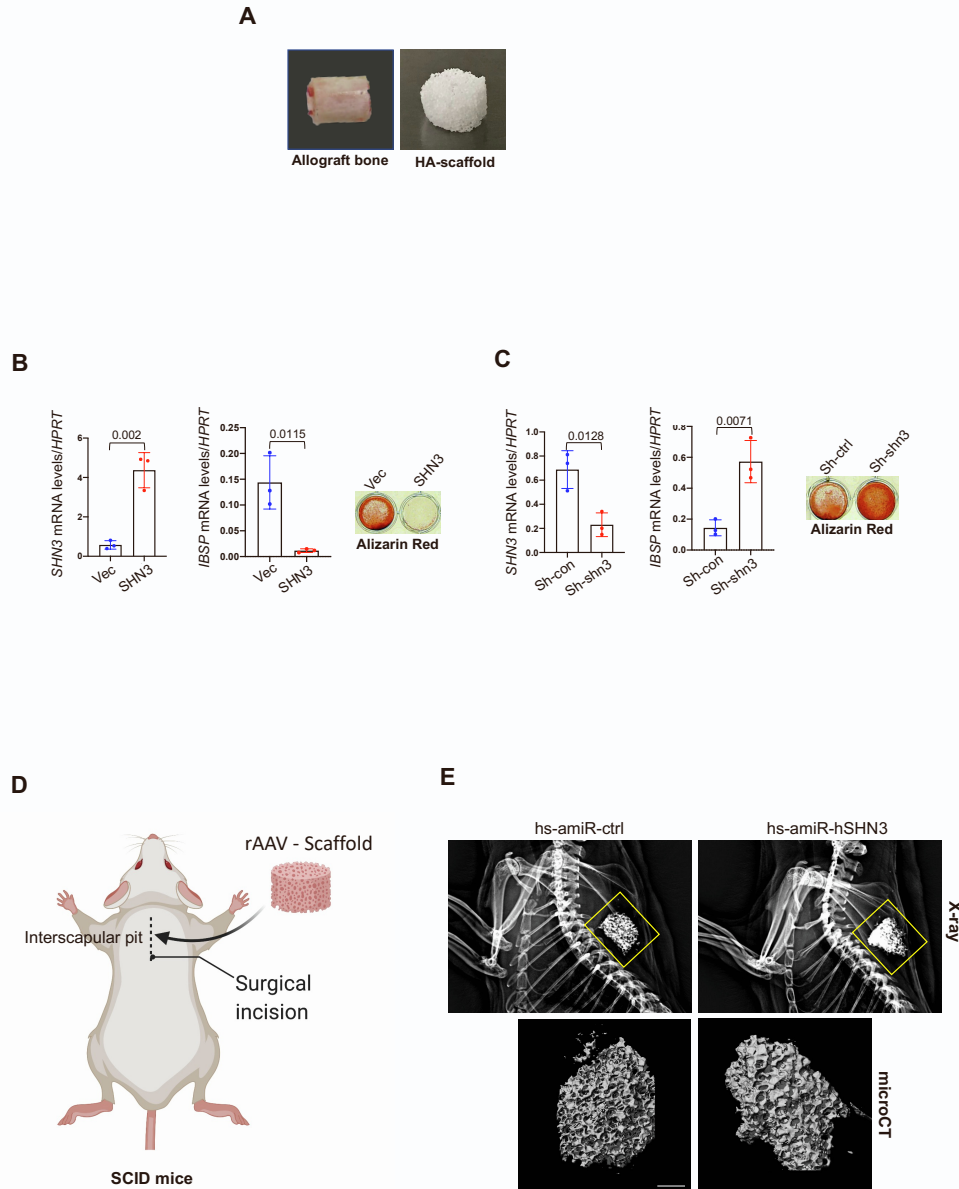

**Fig. S10. Generation of a human skeletal organoid in xenograft mice.**

**A.** Representative pictures showing mouse decellularized bone graft and hydroxyapatite (HA)-based scaffold. **B, C.** Human BMSCs were transduced with lentiviruses expressing vector control (Vec), mouse SHN3 (1-3557 aa, **B**), control-shRNA (Sh-con), or Shn3-shRNA (Sh-shn3, **C**), cultured under osteogenic conditions, and mRNA levels of *SHN3* and *IBSP* were measured by RT-PCR. Alternatively, mineralization deposit was assessed by alizarin red staining (n=3). **D, E.** Diagram showing a surgery procedure to implant a human skeletal organoid into the interscapular fat pad of immunodeficient SCID mice (created with biorender.com) (**D**). The HA-scaffold was incubated with rAAV9.DSS carrying *hs-amiR-ctrl* or *hs-amiR-hSHN3* for one hour, and then human BMSCs were cultured on the AAV-treated scaffold under osteogenic conditions for two days. The treated scaffold was implanted into the interscapular fat pads, and four weeks later, bone formation was assessed by radiography (**E, top**) and microCT (**E, bottom**, n=5). Values represent mean  $\pm$  SD by an unpaired two-tailed Student's t-test.

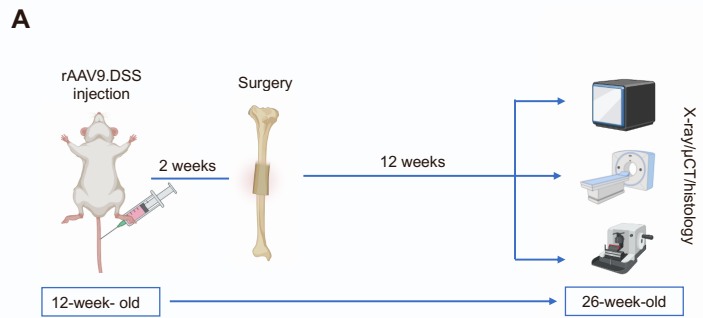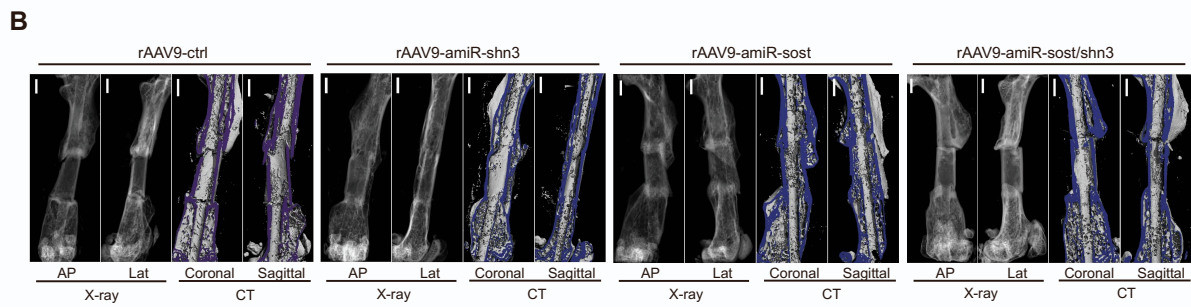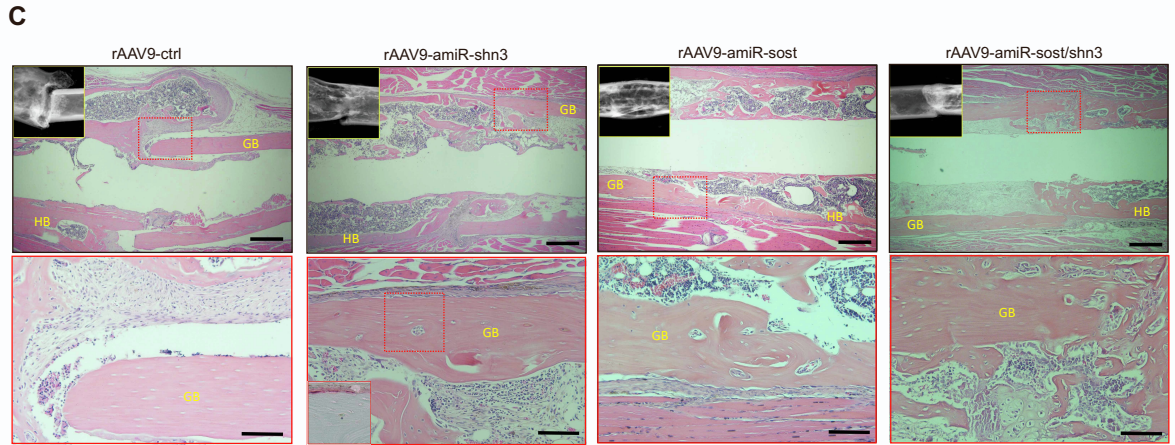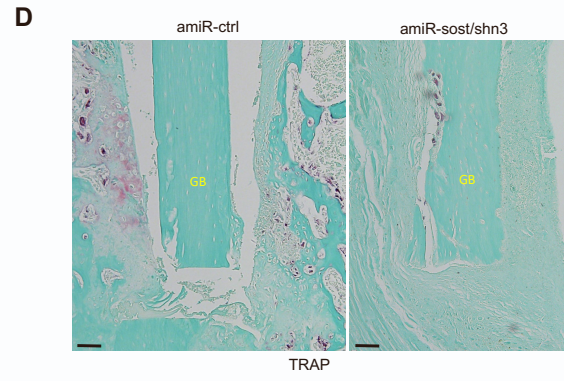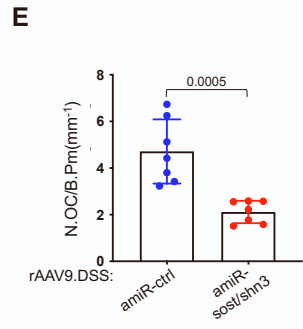

**Fig. S11. Therapeutic effects of systemically delivered WNT-modulating gene silencers on critical-sized bone defect**

**A.** Diagram of the study and treatment methods (created with biorender.com). **B-E.** Three-month-old mice were i.v. injected with rAAV9.DSS ( $5 \times 10^{13}$  vg/kg) carrying *amiR-ctrl*, *amiR-shn3*, *amiR-sost*, or *amiR-sost/shn3*, and two weeks later, decellularized isograft was implanted into the osteotomy site of the left femurs. Twelve weeks later, radiography, microCT, and H&E staining were performed on the injured femurs to assess the rate of osseous union between the implanted isograft to the host bone. (n = 5–6, **B, C**). HB: host bone, GB: graft bone. The same experiment was performed in **Fig. 6A and B**. Alternatively, the injured femurs were stained for TRAP and TRAP-stained osteoclasts were quantitated (n = 7, **D, E**). Scale bars: B, 1 mm; C, top, 400  $\mu$ m; C bottom, D, 100  $\mu$ m. Values represent mean  $\pm$  SD by an unpaired two-tailed Student's t-test.



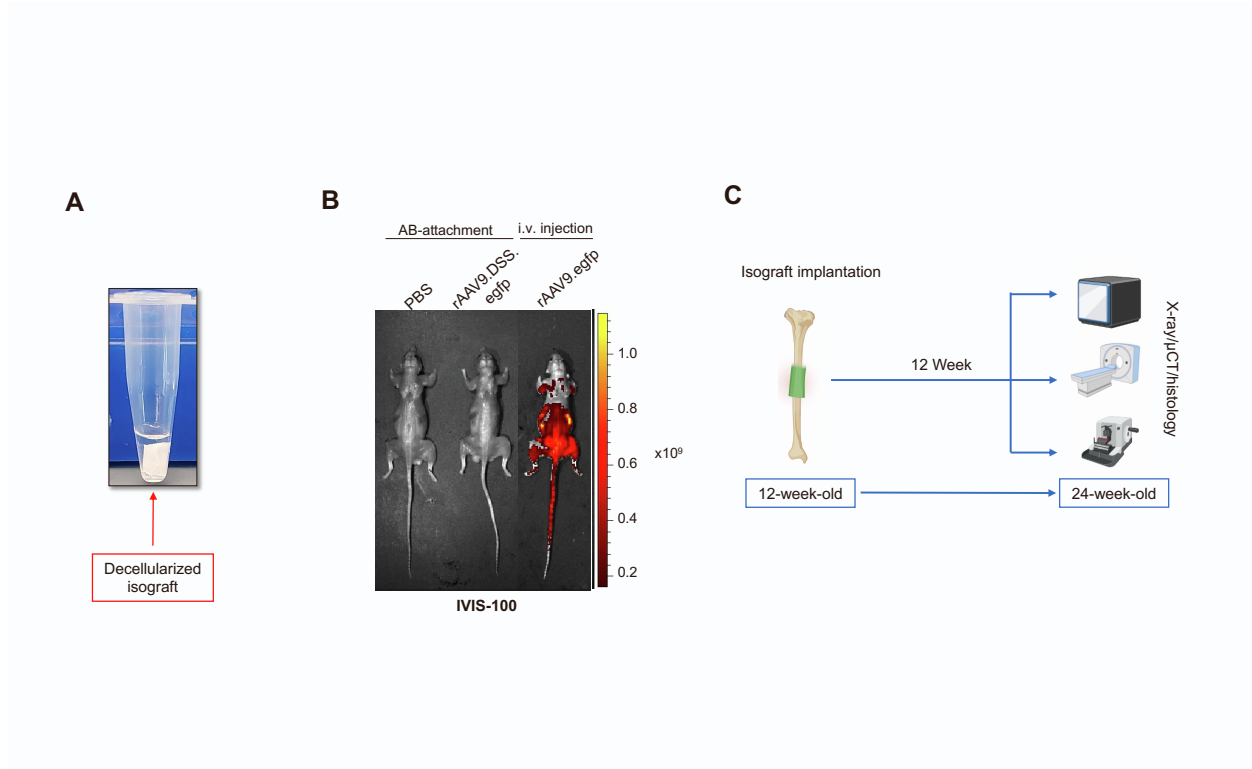

**Fig. S12. Transplantation of the isograft carrying WNT-modulating gene silencers to the osteotomy sites in a mouse model of critical-sized bone defect**

**A.** Preparation of decellularized isograft attached with rAAV9.DSS. Decellularized isograft was incubated with rAAV9.DSS ( $2.5 \times 10^{11}$  GC) for one hour. **B.** PBS-treated or rAAV9.DSS.*egfp*-attached isograft was implanted into the osteotomy site of left femurs in 3-month-old mice, and three weeks later, EGFP expression in whole body was monitored by IVIS-100 optical imaging. For systemic delivery, rAAV9.DSS.*egfp* ( $5 \times 10^{13}$  vg/kg) was i.v. injected into mice (n = 3). The same experiment was performed in **Fig. 6C**. **C.** Diagram of the study and treatment methods (created with biorender.com).

Tables S1-S2

Table S1

|                                           | <b>amiR-ctrl</b> | <b>amiR-shn3</b>  | <b>amiR-sost</b> | <b>amiR-shn3/sost</b>              |
|-------------------------------------------|------------------|-------------------|------------------|------------------------------------|
| <b>WNT signaling threshold</b>            | weak             | intermediate      | intermediate     | strong                             |
| <b>Osteogenesis</b>                       | no effect        | mild increase     | mild increase    | strong increase and wane over time |
| <b>Osteoclastogenesis</b>                 | no effect        | no effect         | mild decrease    | strong decrease by OPG             |
| <b>Bone accrual</b>                       | no effect        | mild increase     | mild increase    | strong increase                    |
| <b>Early bone regeneration</b>            | no effect        | increase          | increase         | increase                           |
| <b>Osteoporosis</b>                       | no effect        | complete reversal | partial reversal | complete reversal                  |
| <b>Bone fracture healing</b>              | no effect        | increase          | increase         | little to mild increase            |
| <b>Critical-sized bone defect healing</b> | no effect        | increase          | increase         | no effect                          |



|                                                              |                                                                                                                                                                                                                                                                                                                                                                                                                                                                                                                                                         |
|--------------------------------------------------------------|---------------------------------------------------------------------------------------------------------------------------------------------------------------------------------------------------------------------------------------------------------------------------------------------------------------------------------------------------------------------------------------------------------------------------------------------------------------------------------------------------------------------------------------------------------|
| human amiR-33<br>-mouse shn3<br>( <i>hs-amiR-shn3</i> )      | acggaggcctgccctgactgccacggtgccgtggcacaagaggatctaagggcacgctgagggcctacctaaccatcgt<br>ggggaataaggacagtgtcacccctgcaggggatccggtggtggtgcaaatcaagaactgctcctcagtggatgtgccttta<br>cttctaggcctgtacggaagtgttacttctgctctaaaagctgcggaattgtaccgcggccgatccaccggtgccaccatggg<br>gcagcctggagtgggttctgccccctgggcacacaaacagagctgaagaccaccctgggcacctcctggctggccgca<br>tacctcctggcgggcagctgtgtacaaactactgtgagagcaggtgttctggtggtaccacctgctctgtaatagtttgtacacag<br>aggcctgcctggccctcagagactgccctgactgaaggccctatcaggtgggggaggggatcctgatagagggcactgctg<br>ccactgtggggcccaagaagct |
| Human amiR-33-<br>human shn3-1<br>( <i>hs-amiR-hshn3-1</i> ) | ggcagccttgagtggttctgccccctgggcacacaaacagagctgaagaccaccctgggcacctcctggctggccgc<br>atacctcctggcgggcagctgtgtttcatggttaagtcaaggctgttctggtggtaccacgcttgaagatgcatggaaacac<br>agaggcctgcctggccctcagagactgccctgactgaaggccctatcaggtgggggaggggatcctgatagagggcactg<br>ctgccactgtggggcccaag                                                                                                                                                                                                                                                                         |
| Human amiR-33-<br>human shn3-2<br>( <i>hs-amiR-hshn3-2</i> ) | ggcagccttgagtggttctgccccctgggcacacaaacagagctgaagaccaccctgggcacctcctggctggccgc<br>atacctcctggcgggcagctgtgtccatggttaagtcaaggctgttctggtggtaccacagcctgttctaccatggacaca<br>gaggcctgcctggccctcagagactgccctgactgaaggccctatcaggtgggggaggggatcctgatagagggcactgct<br>gccactgtggggcccaag                                                                                                                                                                                                                                                                           |
| Human SHN3 shR                                               | ccgggcctgaacttaccatggaaactcagtttccatggttaagtcaaggctttt                                                                                                                                                                                                                                                                                                                                                                                                                                                                                                  |
